# Supplementary material for: Polar organic solvents accelerate the rate of DNA strand replacement reaction
Source: Royal Society of Chemistry journal article supplement (doi:10.1039/c4an02302a), 2015-01-01
Supplement: c4an02302a1.pdf [file c4an02302a1.pdf]

## SUPPORTING INFORMATION

### **Polar Organic Solvents Accelerate the Rate of DNA Strand Replacement Reaction**

Tianchi Zhang,<sup>†a</sup> Chunli Shang,<sup>†a</sup> Ruixue Duan,<sup>a</sup> Abdul Hakeem,<sup>a</sup> Zhenyu Zhang,<sup>a</sup> Xiaoding Lou,<sup>a</sup> Fan Xia<sup>ab\*</sup>

<sup>a</sup>Key Laboratory for Large-Format Battery Materials and System, Ministry of Education, School of Chemistry and Chemical Engineering, Huazhong University of Science and Technology, Wuhan 430074, China.

<sup>b</sup>National Engineering Research Center for Nanomedicine Institute of Materia Medica, College of Life Science & Technology, Huazhong University of Science and Technology, Wuhan 430074, China..

<sup>†</sup> These authors contributed equally to this work.

\* Correspondence and requests for materials should be addressed to Fan Xia. (email: xiafan@hust.edu.cn).

**Table S1.** Replacement ratios of system 1 in different solutions in 60s, 300s, and 600s

**Table S2.** Replacement ratios of system 2 in different solutions in 60s, 300s, and 600s

**Table S3.** DNA Sequences

**Table S1.** Replacement ratios of system 1 in different solutions in 60s, 300s, and 600s

|                   | DSRR time | aqueous buffer | 70% buffer & 30% glycerin | 70% buffer & 30% glucose | 70% buffer & 30% acetone | 70% buffer & 30% DMSO |
|-------------------|-----------|----------------|---------------------------|--------------------------|--------------------------|-----------------------|
| Replacement ratio | 60s       | 9%             | 44%                       | 57%                      | 59%                      | 63%                   |
|                   | 300s      | 22%            | 69%                       | 65%                      | 74%                      | 75%                   |
|                   | 600s      | 31%            | 73%                       | 70%                      | 76%                      | 77%                   |

**Table S1.** Replacement ratios of the simple system in aqueous buffer and some polar organic solvents mixed buffer solutions. All of these polar organic solvents promote the replacement ratios, especially in the beginning of reaction.

**Table S2.** Replacement ratios of system 2 in different solutions in 60s, 300s, and 600s

|                   | DSRR time | aqueous buffer | 70% buffer & 30% ethanol | 70% buffer & 30% glycerin |
|-------------------|-----------|----------------|--------------------------|---------------------------|
| Replacement ratio | 60s       | 6%             | 17%                      | 7%                        |
|                   | 300s      | 11%            | 39%                      | 20%                       |
|                   | 600s      | 15%            | 52%                      | 29%                       |

**Table S2.** Polar organic solvents also have promotion in replacement ratios of complicated system, although the effect is not as obvious as that of system 1.

**Table S3.** DNA Sequences

---

| Name | Sequences (5'-3')                                                                                |
|------|--------------------------------------------------------------------------------------------------|
| A    | CTGGAATCGTCGTTTACGGTCCACACAGTAGATCAGAATTGGCACGTTTCGCTCGCTAGGTTGAAGTCACCCTCATT- <u>Iowa black</u> |
| B    | <u>TAMRA</u> -AATGAGGGTGACTTC GACCGTAAACGACGA                                                    |
| A'   | AATGAGGGTGACTTCAACCTAGCGAGCGAACGTGCCAATTCTGATCTACTGTGTG GACCGTAAACGACGA                          |
| B'   | TCGTCGTTTACGGTC GAAGTCACCCTCATT                                                                  |

---

**Table S3.** Strand B is modified with TAMRA (red-fluorescent tetramethylrhodamine) at 5' terminus while strand A is modified with Iowa Black (quencher of TAMRA) at 3' terminus.
